# Supplementary material
Source: publisher site journal article supplement (https://www.dovepress.com/article/471620)
Supplement: Supplementary file 1 [file get_supplementary_file.php]

Table S1 Univariate analysis of tumour markers and fertility

| Factors | | Endometrial cancer (n=68) | Endometrial hyperplasia (n=132) | *X2*/*t* value | *p* value |
| --- | --- | --- | --- | --- | --- |
| CA125 | Range (U/mL) | 7.73 -119.09 | 11.23-93.28 | 1.458 | 1.965 |
| Median value (U/mL) | 26.08 | 28.28 |
| Mean value (U/mL) | 37.81 ± 28.02 | 32.60 ± 15.75 |
| CA199 | Range (U/mL) | 0.6-110.23 | 0.6-93.28 | 0.148 | 0.052 |
| Median value (U/mL) | 26.22 | 27.35 |
| Mean value (U/mL) | 37.36 ± 26.62 | 30.50 ± 17.51 |
| Number of childbirth (times) | | 1.38 ± 0.85 | 1.17 ± 0.65 | 1.715 | 0.089 |
| Number of pregnancies (times) | | 2.43 ± 1.37 | 2.32 ± 1.22 | 0.567 | 0.572 |
| History of pregnancy | | 64 (94.12%) | 125 (94.70%) | 1.177 | 0.278 |
| No history of pregnancy | | 4 (5.88%) | 7 (5.30%) |

Table S2 Comorbidities and analysis of clinical symptoms in the two groups

| Factors | | Endometrial cancer (n=68) | Endometrial hyperplasia (n=132) | *X2*/*t* value | *P* value |
| --- | --- | --- | --- | --- | --- |
| High blood pressure | Yes | 18 (26.47%) | 29 (21.97%) | 0.807 | 0.369 |
| No | 50 (73.53%) | 103 (78.03%) |
| Diabetes | Yes | 12 (17.65%) | 26 (19.70%) | 0.005 | 0.945 |
| No | 56 (82.35%) | 106 (80.30%) |
| Uterine fibroids | Yes | 18 (26.47%) | 28 (21.21%) | 0.349 | 0.555 |
| No | 50 (73.53%) | 104 (78.79%) |
| Ovarian cysts | Yes | 8 (11.76%) | 16 (12.12%) | 0.004 | 0.953 |
| No | 60 (88.24%) | 116 (87.88%) |
| Endometriosis | Yes | 15 (22.06%) | 24 (18.18%) | 0.651 | 0.420 |
| No | 53 (77.94%) | 108 (81.82%) |
| Irregular bleeding | Yes | 44 (64.71%) | 69 (52.27%) | 2.112 | 0.146 |
| No | 24 (35.29%) | 63 (47.73%) |
| Abnormal vaginal discharge | Yes | 20 (29.41%) | 33 (25.0%) | 0.541 | 0.462 |
| No | 48 (70.59%) | 99 (75.0%) |
| Lower abdominal pain | Yes | 7 (10.29%) | 15 (11.36%) | 0.009 | 0.926 |
| No | 61 (89.71%) | 117 (88.64%) |
